# Supplementary material
Source: MDPI journal article supplement (https://www.mdpi.com/2410-3888/6/4/78)
Supplement: s1 [file s1]

## Supplementary material

**Table S1. Number of alleles for the twelve loci genotyped in meagre broodstocks**

|           | No of alleles sampled |       |       |       |       |       |       |       |       |       |       |
|-----------|-----------------------|-------|-------|-------|-------|-------|-------|-------|-------|-------|-------|
|           | Stock                 | Stock | Stock | Stock | Stock | Stock | Stock | Stock | Stock | Stock | Stock |
|           | A                     | B     | C     | D     | E     | F     | G     | H     | I     | J     | K     |
| Cascmic14 | 4                     | 5     | 4     | 3     | 5     | 4     | 5     | 4     | 5     | 3     | 5     |
| Soc-11    | 5                     | 7     | 4     | 5     | 6     | 5     | 8     | 4     | 6     | 4     | 7     |
| Soc-35    | 5                     | 5     | 4     | 3     | 3     | 5     | 6     | 2     | 4     | 3     | 4     |
| Soc-405   | 3                     | 3     | 3     | 3     | 2     | 3     | 3     | 2     | 4     | 3     | 3     |
| Soc-42    | 7                     | 9     | 6     | 6     | 3     | 6     | 8     | 3     | 10    | 3     | 6     |
| Soc-431   | 4                     | 4     | 3     | 3     | 3     | 4     | 4     | 3     | 3     | 3     | 4     |
| Soc-44    | 2                     | 5     | 5     | 2     | 3     | 3     | 4     | 3     | 4     | 3     | 5     |
| Uba-005   | 2                     | 3     | 2     | 2     | 3     | 2     | 3     | 2     | 3     | 2     | 3     |
| Uba-006   | 5                     | 6     | 4     | 3     | 4     | 6     | 6     | 1     | 4     | 2     | 5     |
| Uba-042   | 3                     | 5     | 3     | 3     | 3     | 3     | 4     | 2     | 3     | 2     | 3     |
| Uba-050   | 6                     | 6     | 3     | 4     | 4     | 5     | 5     | 2     | 4     | 3     | 4     |
| Uba-054   | 2                     | 2     | 2     | 2     | 2     | 2     | 2     | 2     | 3     | 2     | 2     |
| Average   | 4,00                  | 5,00  | 3,58  | 3,25  | 3,42  | 4,00  | 4,83  | 2,50  | 4,42  | 2,75  | 4,25  |

**Table S2. Statistical summary of the performance of Coancestry software methods in the exploratory analysis of the 11 stocks for method selection.** The coefficient of linear correlation between all methods as well as their variance is given.

| Correlation Coefficient | TrioML  | Wang    | LynchLi | LynchRd | Ritland | QuellerGt | DyadML |
|-------------------------|---------|---------|---------|---------|---------|-----------|--------|
| TrioML                  | 1,00000 |         |         |         |         |           |        |
| Wang                    | 0,75285 | 1,00000 |         |         |         |           |        |
| LynchLi                 | 0,76592 | 0,97722 | 1,00000 |         |         |           |        |
| LynchRd                 | 0,87778 | 0,78018 | 0,78216 | 1,00000 |         |           |        |

|                 |         |          |          |          |          |         |         |
|-----------------|---------|----------|----------|----------|----------|---------|---------|
| Ritland         | 0,63836 | 0,56091  | 0,58056  | 0,74478  | 1,00000  |         |         |
| QuellerGt       | 0,83700 | 0,87577  | 0,90519  | 0,88152  | 0,70389  | 1,00000 |         |
| DyadML          | 0,97694 | 0,77075  | 0,78289  | 0,90031  | 0,65864  | 0,85956 | 1,00000 |
| <b>Mean</b>     | 0,13352 | -0,01644 | -0,01833 | -0,00107 | -0,00114 | 0,00271 | 0,14685 |
| <b>Variance</b> | 0,03442 | 0,11605  | 0,12933  | 0,05389  | 0,03443  | 0,08412 | 0,03852 |

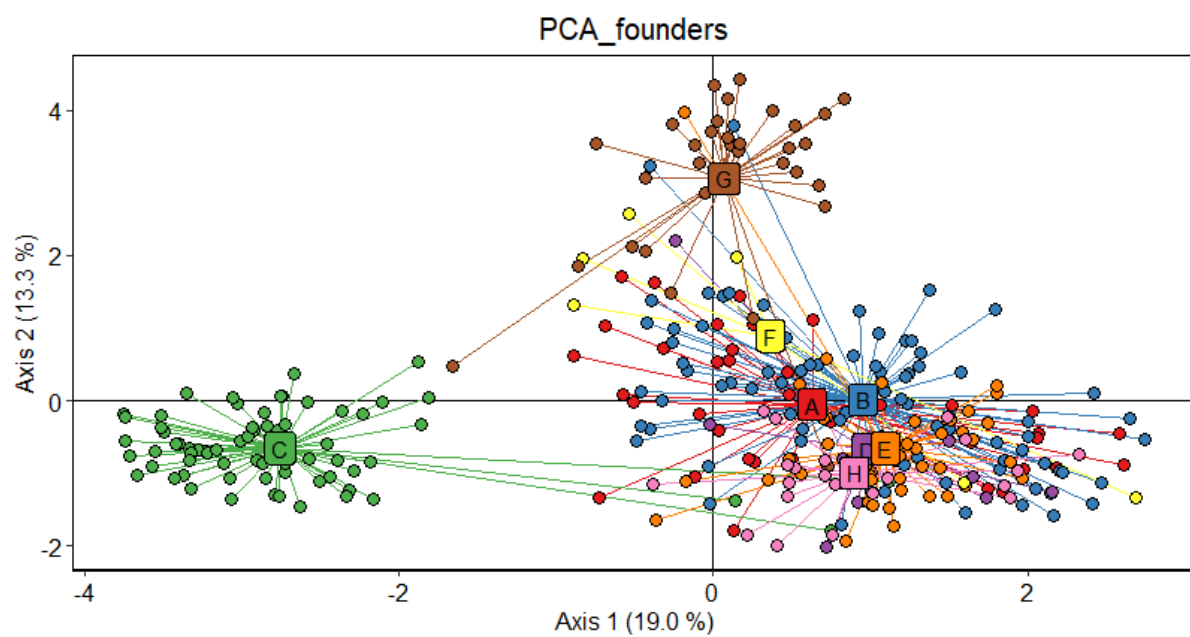

Figure S1. PCA analysis only for the eight breeder stocks A to H

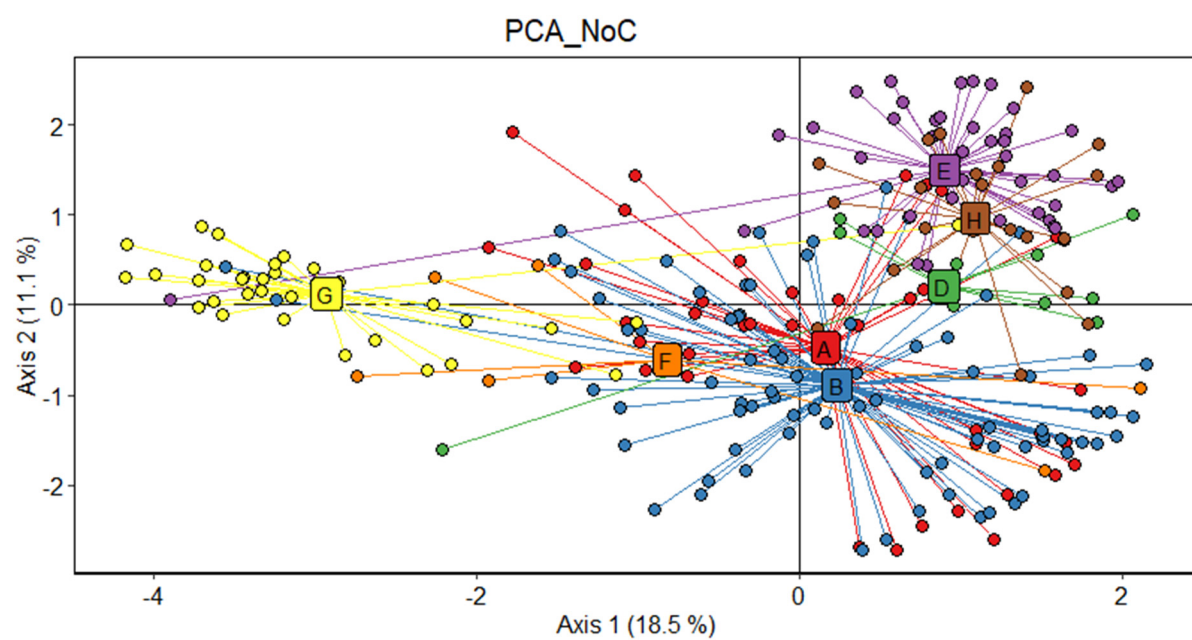

Figure S2. PCA analysis using the breeder stocks A, B, D, E, F, G, H to highlight the resolution in cluster 2 from DAPC analysis of Figure 4
